# Supplementary material for: Impact of the COVID-19 Pandemic on the Mental Health of College Students: A Systematic Review and Meta-Analysis
Source: PubMed Central journal article supplement (PMC8316976; doi:10.3389/fpsyg.2021.669119), 2021-07-14
Supplement: Image_1.pdf [file Image_1.pdf]

**SUPPLEMENTARY FIGURE 1**

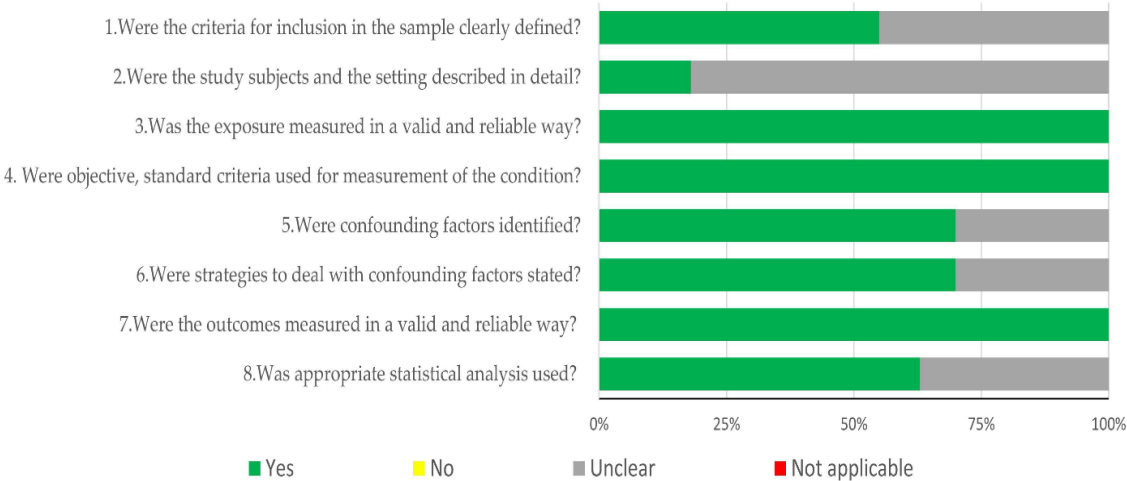

**FIGURE** Based on JBI Checklist quality evaluation chart.
